# Supplementary material
Source: MDPI journal article supplement (https://www.mdpi.com/2254-9625/14/1/14)
Supplement: s1 [file s1]

**Supplementary Table S1: Search strategy, for each databased**

| Sets  | Topics                  | Pubmed/MEDLINE                                                                                                                                                                                                                                                                                                                 |
|-------|-------------------------|--------------------------------------------------------------------------------------------------------------------------------------------------------------------------------------------------------------------------------------------------------------------------------------------------------------------------------|
| Set 1 | Climate change          | ((("climat*"[Title/Abstract] AND "change*"[Title/Abstract]) OR "Climate Change"[MeSH Terms])                                                                                                                                                                                                                                   |
| Set 2 | Mental health           | ((("mental*"[Title/Abstract] OR "psychiatric*"[Title/Abstract] OR "behaviour*"[Title/Abstract] OR "behavior*"[Title/Abstract]) AND ("disorder*"[Title/Abstract] OR "illness*"[Title/Abstract] OR "disease*"[Title/Abstract] OR "diagnosis"[Title/Abstract])) OR "Mental Health"[MeSH Terms] OR "Mental Disorders"[MeSH Terms]) |
| Set 3 | Combine Set 1 AND Set 2 |                                                                                                                                                                                                                                                                                                                                |
| Sets  | Topics                  | Scopus                                                                                                                                                                                                                                                                                                                         |
| Set 1 | Climate change          | (( ( KEY ( climat* AND change* ) ) OR ( TITLE ( climat* AND change* ) ) ) OR ( ( KEY ( climate AND sensitivity ) ) OR ( TITLE ( climate AND sensitivity ) ) ) OR ( ( TITLE ( climate AND variability ) ) OR ( KEY ( climate AND variability ) ) ) )                                                                            |
| Set 2 | Mental health           | (( ( KEY ( mental* OR psychiatr* OR behaviour* OR behavior* ) ) OR ( TITLE ( mental* OR psychiatr* OR behaviour* OR behavior* ) ) ) AND ( ( TITLE ( disorder* OR illness* OR disease* OR diagnos* ) ) OR ( KEY ( disorder* OR illness* OR disease* OR diagnos* ) ) ) )                                                         |
| Set 3 | Combine Set 1 AND Set 2 |                                                                                                                                                                                                                                                                                                                                |

**Supplementary Table S2: Detailed inclusion/exclusion criteria, defined according to PECOS (Population, exposure, comparison, outcome, study design).**

| <b>Search Strategy</b>    | <b>Details</b>                                                                                                                                                                                                                                                                                                                                                                                                                                                                                                                                                                                                                                      |
|---------------------------|-----------------------------------------------------------------------------------------------------------------------------------------------------------------------------------------------------------------------------------------------------------------------------------------------------------------------------------------------------------------------------------------------------------------------------------------------------------------------------------------------------------------------------------------------------------------------------------------------------------------------------------------------------|
| <b>Inclusion criteria</b> | <p>P: adolescents and adults (including elderly), female and male</p> <p>E: perception/awareness of climate change</p> <p>C: lowest perception/awareness of climate change</p> <p>O: Any type of mental health outcome (self-reported or assessed by neurological tests, and/or medical records, and/or clinical visit/examination, and/or imaging, and/or blood tests)</p> <p>S: original, observational study (including cross-sectional, case-control, or cohort both prospective and retrospective studies), published as peer-reviewed articles in international scientific journals</p>                                                       |
| <b>Exclusion criteria</b> | <p>P: children</p> <p>E: experience of climate change events, seasonality variability, meteorological events, vulnerability to climate change, extreme weather events, natural disasters, climate change measured as meteorological parameter variations</p> <p>C: not applicable</p> <p>O: other health outcomes</p> <p>S: not original (reviews with or without meta-analysis), not performed among humans, not observational (as for instance trials), not published as peer-reviewed articles in international scientific journals (book, book chapter, thesis), no full-text papers (abstract, conference paper, letter, commentary, note)</p> |
| <b>Language</b>           | English                                                                                                                                                                                                                                                                                                                                                                                                                                                                                                                                                                                                                                             |
| <b>Time filter</b>        | none                                                                                                                                                                                                                                                                                                                                                                                                                                                                                                                                                                                                                                                |

**Supplementary Table S3. Item-by-item quality assessment of each included studies, reported in alphabetical order**

|                                   | selection |           |           |           | comparability |            | outcome   |           | NOS evaluation |          | Additional information                                                                                  |                          |              |
|-----------------------------------|-----------|-----------|-----------|-----------|---------------|------------|-----------|-----------|----------------|----------|---------------------------------------------------------------------------------------------------------|--------------------------|--------------|
| Author,<br>year                   | Item<br>1 | Item<br>2 | Item<br>3 | Item<br>4 | Item<br>5a    | Item<br>5b | Item<br>6 | Item<br>7 | Total          | Quality  | Adjustments                                                                                             | Conflict of<br>interests | Funds        |
| Barchielli,<br>2022 [31]          | *         | *         | *         | *         | -             | -          | **        | *         | 7              | high     | not applicable                                                                                          | no                       | no           |
| Gunasiri,<br>2022 [32]            | *         | -         | *         | *         | -             | -          | **        | *         | 6              | moderate | not applicable                                                                                          | no                       | no           |
| Kabir, 2018<br>[35]               | *         | -         | -         | -         | -             | -          | -         | *         | 2              | low      | not applicable                                                                                          | not declared             | not declared |
| Leonhardt,<br>2022 [30]           | *         | -         | *         | *         | *             | *          | **        | *         | 8              | high     | sociodemographics,<br>leisure activities,<br>mental health,<br>cannabis use and<br>alcohol intoxication | no                       | no           |
| Lykins,<br>2023 [33]              | *         | -         | -         | *         | -             | -          | **        | *         | 5              | moderate | not applicable                                                                                          | not declared             | yes          |
| Middleton,<br>2020 [34]           | *         | -         | -         | -         | -             | -          | -         | -         | 1              | low      | not applicable                                                                                          | no                       | yes          |
| Schwartz,<br>2022 [28]            | *         | -         | -         | *         | -             | -          | **        | *         | 5              | moderate | no                                                                                                      | no                       | yes          |
| Temte, 2019<br>[29]               | *         | -         | -         | *         | -             | -          | *         | *         | 4              | moderate | not applicable                                                                                          | no                       | yes          |
| Verplanken,<br>2013 [26]          | -         | -         | -         | *         | *             | -          | **        | *         | 5              | moderate | not applicable                                                                                          | no                       | yes          |
| Weierstall-<br>Pust, 2022<br>[27] | *         | *         | -         | *         | -             | -          | **        | *         | 6              | moderate | no                                                                                                      | no                       | yes          |
